# Supplementary material
Source: Research Square preprint supplement (doi:10.21203/rs.3.rs-10058223/v1)
Supplement: Supplementary file 1 [file 0aced3ba6deec43432253b3b.docx]

**Table S1**. Search strategy

| Database type | Date Run | December 12, 2025 |
| --- | --- | --- |
| **PubMed** | Search (using MeSH terms) | ("Fingerprints"[MeSH] OR fingerprint*[tiab] OR fingermark*[tiab] OR "latent fingerprint*"[tiab]) AND("DNA Fingerprinting"[MeSH] OR "Forensic Genetics"[MeSH] OR "Forensic Sciences"[MeSH] OR "touch DNA"[tiab] OR "trace DNA"[tiab] OR "forensic DNA"[tiab] OR "DNA profiling"[tiab] OR "DNA typing"[tiab]) AND (recovery[tiab] OR extraction[tiab] OR collection[tiab] OR development[tiab] OR reagent*[tiab] OR contamination[tiab] OR handling[tiab] OR environment*[tiab]) |
| Filters | Period: 2000 onward  Language: English & Human |
| Number of articles obtained | 992 |
| **Scopus** | Date Run | December 12, 2025 |
| Search (using query string) | ("latent fingerprint" OR "fingerprint DNA" OR "touch DNA") AND ("DNA typing" OR "DNA profiling") AND forensic |
| Filter | Period: 2000 onward  Language: English |
| Number of articles obtained | 1870 |
| **ScienceDirect** | Date Run | December 23, 2025 |
|  | Search (using query string) | ("latent fingerprint" OR "fingerprint DNA" OR "touch DNA") AND ("DNA typing" OR "DNA profiling") AND forensic |
|  | Filter | Period: 2000 onward  Language: English |
|  | Number of articles obtained | 660 |
