# Supplementary material
Source: Research Square preprint supplement (doi:10.21203/rs.3.rs-10058223/v1)
Supplement: Supplementary file 2 [file 4544b605e8e0780fdb565da9.docx]

**Supplementary Material 3.** Summary of all fingerprint enhancement reagents used in the studies from January 2000 – December 2025 and their effect on DNA profiling.

| **No** | **Fingerprint Development Techniques (FDT)** | **Observations on effect of FDT on STR profiling across the studies** | **All studies used FDT** |
| --- | --- | --- | --- |
| **1** | columnar thin film (CTF) | Does not inhibit [48], [51], [73], [81] | [48], [51], [73], [81] |
| **2** | Ninhydrin | Does not inhibit [16], [19], [20], [56], [58], [82] | [15], [16], [19], [20], [36], [56], [58], [59], [72],[82] |
| **3** | Black Magnetic powder | Does not inhibit [13], [32], [45], [50], [64] | [13], [14], [27], [32], [45], [41], [50], [64], [65], [78] |
| **4** | Black Powder | Does not inhibit [13], [45], [49], [50], [66] | [6], [10], [13], [14], [15], [17], [21], [27], [32], [41], [45], [47], [48], [50], [59], [63], [66], [72] |
| **5** | Aluminium powder | Does not inhibit [66] | [14], [41], [57], [66] |
| **6** | Wet Powder | Does not inhibit [72] | [65], [72] |
| **7** | Cyanoacrylate (CA) | Does not inhibit [48], [56], [59] | [30], [48], [56], [59], [62], [63], [72] |
| **8** | DFO (1,8-Diazafloren-9-one) | Does not inhibit [16], [63], [56], [82] | [7], [16], [36], [56], [59], [63], [82] |
| **9** | Iodine fuming | Does not inhibit [75] | [20], [75] |
| **10** | 1,2-indanedione (in ethyl acetate or in acetic acid) | Does not inhibit [29], [75] | [29], [75] |
| **11** | 1,2-Indanedione zinc (IND-Zn) | Does not inhibit [7], [36] | [7], [26], [36] |
| **12** | Lumicyano | Does not inhibit [62] | [62] |
| **13** | Fluorescent Red Powder | Does not inhibit [55] | [55] |
| **14** | Fluorescent Green Powder | Does not inhibit [55] | [55] |
| **15** | Fluorescent Yellow Powder | Does not inhibit [55] | [13], [23], [55], [50] |
| **16** | Infrared Fluorescent Powder (*fp*Natural 1TM) | Does not inhibit [11] | [11] |
| **17** | Soot powder | Does not inhibit [64] | [64] |
| **18** | White powder | Does not inhibit [14], [63], [66] | [8], [13], [14], [59], [63], [66] |
| **19** | UVITEX OB | Does not inhibit [60] | [60] |
| **20** | Laser + Reflected Ultraviolet Imaging System (RUVIS) + CA + RUVIS + Rhodamine 6G | Does not inhibit [8] | [8] |
| **21** | Amido Black | Does not inhibit [82] | [19], [25], [59], [82] |
| **22** | DMAB + IN-Zn | Does not inhibit (only when DNA typed shortly after treatment) [26] | P26] |
| **23** | Silver nitrate | Inhibit [72] | [72], [75] |
| **24** | Red Magnetic powder | Inhibit [66] | [13], [66] |
| **25** | Physical Developer (PD) | Inhibit [36], [72] | [36], [72] |
| **26** | Coomassie Brilliant Blue | Inhibit [75] | [75] |
| **27** | Grey Magnetic Powder | FDT effect not studied | [50] |
| **28** | Blitz Green Magnetic powder | FDT effect not studied | [13] |
| **29** | Silver Gray Magnetic powder | FDT effect not studied | [13] |
| **30** | Red powder | FDT effect not studied | [13] |
| **31** | Magneta Flake Light powder | FDT effect not studied | [41] |
| **32** | Silver powder | FDT effect not studied | [23] |
| **33** | Black Powder Suspension (BPS) | FDT effect not studied | [3] |
| **34** | Black Emerald Magnetic powder | FDT effect not studied | [13] |
| **35** | Silver gray powder | FDT effect not studied | [10], [13] |
| **36** | Metal white powder | FDT effect not studied | [23], [50] |
| **37** | Metal black powder | FDT effect not studied | [23], 50 |
| **38** | Metal grey powder | FDT effect not studied | [50] |
| **39** | Fluorescent pink powder | FDT effect not studied | [23], [50] |
| **40** | Fluorescent Orange powder | FDT effect not studied | [23], [50] |
| **41** | Fluorescence Green powder | FDT effect not studied | [13] |
| **42** | Bichromatic powder | FDT effect not studied | [8], [13] |
| **43** | Bichromatic Magnetic powder | FDT effect not studied | [8] |
| **44** | Small Particle Reagent Dark | FDT effect not studied | [13] |
| **45** | Black Small Particle Reagent white | FDT effect not studied | [13] |
| **46** | Stickyside | FDT effect not studied | [59] |
| **47** | Diamino-benzidine (DAB) | FDT effect not studied | [59] |
| **48** | Oil Red O (ORO) | FDT effect not studied | [36] |
| **49** | *p*dimethylaminobenzaldehude (DMAB) | FDT effect not studied | [26] |
| **50** | DFO + Ninhydrin | FDT effect not studied | [16], [36] |
| **51** | DFO + Ninhydrin + PD | FDT effect not studied | [36] |
| **52** | IND-Zn + Ninhydrin | FDT effect not studied | [36] |
| **53** | IN-Zn + Ninhydrin + PD | FDT effect not studied | [36] |
| **54** | IN-Zn + Ninhydrin + ORO | FDT effect not studied | [36] |
| **55** | IN-Zn + Ninhydrin + ORO + PD | FDT effect not studied | [36] |
| **56** | Cyanoacrylate + Basic Yellow (BY) | FDT effect not studied | P72] |
| **57** | Cyanoacrylate + vacuum metal deposition (VMD) | FDT effect not studied | [59] |
| **58** | Cyanoacrylate + Rhodamine 6G, Ninhydrin + metal salt treatment | FDT effect not studied | [59] |
| **59** | CA + Rhodamine 6G + Bichromatic Magnetic Powder | FDT effect not studied | [8] |
