# Supplementary material
Source: Research Square preprint supplement (doi:10.21203/rs.3.rs-10058223/v1)
Supplement: Supplementary file 3 [file d832dc4bf04f9e96eee17ad8.docx]

**Table S2.** Excluded studies and reason

| **No** | **Title** | **Article Identification** | **Reason for Rejection** |
| --- | --- | --- | --- |
| 1 | Effects of latent fingerprint development reagents on subsequent forensic DNA typing: a review | https://doi.org/10.1016/j.jflm.2015.03.002 | Review article |
| 2 | The effect of DNA recovery on the subsequent quality of latent fingermarks | https://doi.org/10.1016/j.forsciint.2016.08.003 | Studies effect of DNA recovery on fingerprint analysis |
| 3 | Recovery of DNA and fingermarks following deployment of render-safe tools for vehicle-borne improvised explosive devices (VBIED) | https://doi.org/10.1016/j.forsciint.2011.03.006 | DNA is recovered and typed from other source like saliva, and hair but not fingermarks |
| 4 | Artificial fingerprints for cross-comparison of forensic DNA and protein recovery methods | https://doi.org/10.1371/journal.pone.0223170 | DNA not from naturally deposited human fingermarks |
| 5 | The effect of DNA recovery on the subsequent quality of latent fingermarks: A pseudo-operational trial | https://doi.org/10.1016/j.forsciint.2019.110076 | Study effect of DNA recovery on fingerprint analysis |
| 6 | The effects of deprivation on the time spent examining crime scenes and the recovery of DNA and fingerprints | https://doi.org/10.1111/j.15564029.2007.00634.x | Study fingerprint and DNA individually |
| 7 | Latent DNA detection on items of forensic relevance | https://doi.org/10.1016/j.forsciint.2025.112460 | Review article |
| 8 | Predicting probative levels of touch DNA on tapelifts using Diamond™ Nucleic Acid Dye | https://doi.org/10.1016/j.fsigen.2024.103024 | Focus on collection method regardless source of DNA |
| 9 | "MALDI-CSI": A proposed method for the tandem detection of human blood and DNA typing from enhanced fingermarks | https://doi.org/10.1016/j.forsciint.2021.110774 | Mainly focused on detection of Blood from fingermarks |
| 10 | Corneocyte lysis and fragmented DNA considerations for the cellular component of forensic touch DNA | https://doi.org/10.1016/j.fsigen.2020.102428 | Cells originate from entire hand |
| 11 | Comparison of Commercial Kits for Recovery and Analysis of Bacterial DNA From Fingerprints | https://doi.org/10.1111/1556-4029.14280 | Typing of non-human DNA from fingerprint |
| 12 | Persistence and detection of touch DNA and blood stain DNA on pig skin exposed to water | https://doi.org/10.1007/s12024-020-00234-3 | Hand were source of DNA |
| 13 | Forensic touch DNA recovery from metal surfaces – A review | https://doi.org/10.1016/j.scijus.2020.01.002 | Review article |
| 14 | Touch dna as forensic aid: A review | https://doi.org/10.37506/ijfmt.v14i2.2706 | Review article |
| 15 | Touch DNA in forensic science: The use of laboratory-created eccrine fingerprints to quantify DNA loss | https://doi.org/10.1016/j.fsisyn.2019.10.004 | study uses laboratory-created (artificial) eccrine fingerprints, not naturally deposited human fingerprints |
| 16 | Touch DNA collection – Performance of four different swabs | https://doi.org/10.1016/j.fsigen.2019.06.014 | DNA originate from other source not fingermarks |
| 17 | Evaluation of the QIAGEN 140-SNP forensic identification multiplex from latent DNA using massively parallel sequencing | https://doi.org/10.1080/00450618.2019.1573923 | Study does not specifically analyses DNA from fingermarks |
| 18 | Touch DNA: Impact of handling time on touch deposit and evaluation of different recovery techniques: An experimental study | https://doi.org/10.1038/s41598-019-46051-9 | DNA originate from other source not fingermarks |
| 19 | Single source DNA profile recovery from single cells isolated from skin and fabric from touch DNA mixtures in mock physical assaults | https://doi.org/10.1016/j.scijus.2017.12.006 | DNA originate from hand |
| 20 | Direct PCR amplification of DNA from human bloodstains, saliva, and touch samples collected with microFLOQ® swabs | https://doi.org/10.1016/j.fsigen.2017.10.010 | Study does not specifically analyses DNA from fingermarks |
| 21 | Direct PCR amplification of forensic touch and other challenging DNA samples: A review | https://doi.org/10.1016/j.fsigen.2017.10.005 | Review article |
| 22 | Comparison of preprocessing methods and storage times for touch DNA samples | https://dx.doi.org/10.3325/cmj.2017.58.4 | Study does not specifically analyses DNA from fingermarks |
| 23 | High-throughput DNA extraction of forensic adhesive tapes | https://doi.org/10.1016/j.fsigen.2016.06.004 | DNA originate from other source not fingermarks |
| 24 | PE-Swab direct STR amplification of forensic touch DNA samples | https://doi.org/10.1111/1556-4029.12705 | study focuses on development and validation of a direct STR amplification workflow using controlled touch DNA samples, rather than examining DNA recovery or loss from naturally deposited fingerprints |
| 25 | Effects of cyanoacrylate fuming, time after recovery, and location of biological material on the recovery and analysis of DNA from post-blast pipe bomb fragments | https://doi.org/10.1111/j.15564029.2009.01128.x | DNA originate from other source not fingermarks |
| 26 | Trace DNA collection-Performance of minitape and three different swabs | https://doi.org/10.1016/j.fsigss.2009.08.098 | DNA originate from other source not fingermarks |
| 27 | Ninhydrin treatment as a screening method for the suitability of swabs taken from contact stains for DNA analysis | https://doi.org/10.1007/s00414-004-0435-6 | Study does not specifically analyses DNA from fingermarks |
| 28 | Influence of cyanoacrylate on the efficiency of forensic PCRs | https://doi.org/10.1016/S0379-0738(01)00515-1 | DNA originate from other source not fingermarks |
| 29 | Generating STR profile from “Touch DNA” | https://doi.org/10.1016/j.jflm.2011.05.007 | Study does not describe how DNA was recovered fingermarks |
| 30 | The influences of dusty environments on the STR typing success of post-detonation touch DNA samples | https://doi.org/10.1016/j.fsigen.2021.102651 | Study does not specifically analyses DNA from fingermarks |
| 31 | Detection of touch DNA evidence on swab by SYBR®Green I Nucleic Acid Gel Stain | https://doi.org/10.1016/j.forsciint.2022.111477 | DNA originate from other source not fingermarks |
| 32 | Comparison of six commercially available STR kits for their application to touch DNA using direct PCR | https://doi.org/10.1016/j.fsir.2021.100243 | Study does not specifically analyses DNA from fingermarks |
| 33 | Development of a modified p-dimethylaminocinnamaldehyde solution for touch DNA analysis and its application to STR analysis | https://doi.org/10.1016/j.fsigen.2018.10.007 | Study does not specifically analyse DNA from fingermarks |
| 34 | Improvements, factors, and influences on DNA recovery from firearms | https://doi.org/10.1016/j.fsigen.2023.102873 | Study does not specifically analyze DNA from fingermarks |
| 35 | Compatibility of DNA IQ™, QIAamp® DNA Investigator, and QIAsymphony® DNA Investigator® with various fingerprint treatments | https://doi.org/10.1007/s00414-016-1447-8 | Study did not use actual fingermarks |
| 36 | Improved STR profiles from improvised explosive device (IED): fluorescence latent DNA detection and direct PCR | https://doi.org/10.1016/j.fsigen.2019.05.002 | DNA originate from hand |
| 37 | Individual shedder status and the origin of touch DNA | https://doi.org/10.1016/j.fsigen.2021.102626 | DNA originate from hand |
| 38 | Quantifying DNA loss in laboratory-created latent prints due to fingerprint processing | https://doi.org/https://doi.org/10.1016/j.forsciint.2023.111595 | DNA originate from saliva |
| 39 | Acetone facilitated DNA sampling from electrical tapes improves DNA recovery and enables latent fingerprints development. | https://doi.org/https://doi.org/10.1016/j.forsciint.2017.04.023 | Used cultured cells rather than fingerprint samples |
